# Supplementary material for: Development of a novel electrochemical carboxylation system using a microreactor
Source: Royal Society of Chemistry journal article supplement (doi:10.1039/c5ra19289g), 2015-01-01
Supplement: c5ra19289g1.pdf [file c5ra19289g1.pdf]

Electronic Supplementary Information for

**Development of a novel electrochemical carboxylation system using a flow microreactor**

Hiroyuki Tateno<sup>a</sup>, Yoshimasa Matsumura<sup>a</sup>, Koji Nakabayashi<sup>a</sup>, Hisanori Senboku<sup>b</sup>, and Mahito Atobe<sup>a\*</sup>

<sup>a</sup>*Department of Environment and System Sciences, Yokohama National University, 79-7 Tokiwadai, Hodogaya-ku, Yokohama 2408501, Japan.*

<sup>b</sup>*Laboratory of Organic Reaction, Division of Chemical Process Engineering, Graduate School of Engineering, Hokkaido University, Kita 13 Nishi 8, Kita-ku, Sapporo 060-8628, Japan.*

\*To whom the correspondence should be addressed.

E-mail: atobe@ynu.ac.jp

**This PDF file includes:**

Instrumentation

Materials

Experimental procedure

## 1. Instrumentation

Preparative electrolyses were carried out with a Galvanostat (HOKUTO DENKO HABF-501A).

## 2. Materials

All reagents were purchased from commercial supplier and used without further purification. (1-Chloroethyl)benzene (**1**), (1-bromoethyl)benzene (**1'**), benzyl chloride (**3**), 4-methoxybenzyl chloride (**5**), 4-cyanobenzyl chloride (**7**) and tetrabutylammonium tetrafluoroborate ( $\text{Bu}_4\text{NBF}_4$ ) were purchased from Tokyo Chemical Industry. *N,N*-Dimethylmethanamide (DMF) was purchased from Kanto Chemical Co.  $\text{CO}_2$  gas cylinder (>99.999%) was purchased from Toho Sanso Kogyo Co., Ltd.

## 3. Flow Microreactor

Figure S1 shows schematic illustration of the electrosynthetic flow microreactor. The reactor was constructed from platinum (Pt) plate anode (3 cm width, 3 cm length) and Pt, glassy carbon (GC), Stainless, Silver (Ag) or Graphite plate cathodes (3 cm width, 3 cm length). A spacer (20 ~ 80  $\mu\text{m}$  thickness double faced adhesive tape) was used to leave a rectangular channel exposed, and the two electrodes were simply sandwiched together (area of the two electrodes:  $1 \times 3 \text{ cm}^2$ ). After connecting Teflon tubing to inlets and outlet, the reactor was sealed with epoxy resin (Figure S2).

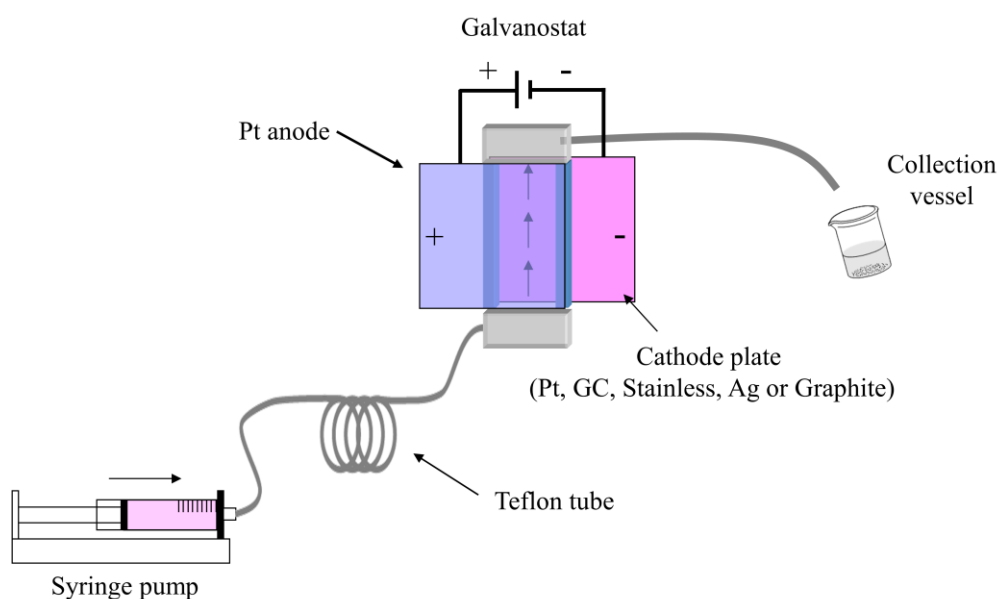

**Figure S1.** Schematic illustration of the electrosynthetic flow microreactor.

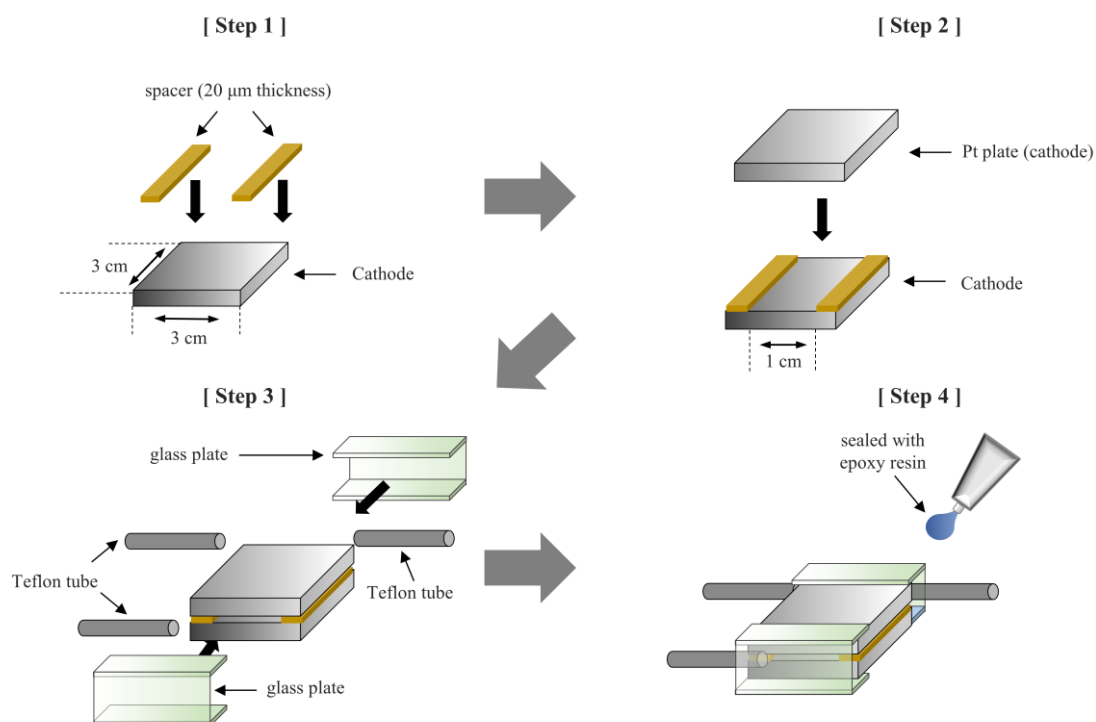

**Figure S2.** Schematic illustration of construction procedure for the electrochemical flow microreactor.

#### 4. General Procedure for Electrochemical Carboxylation of (1-Chloroethyl)benzene Using Bath Type Reactor

Constant current electrolyses were conducted using a galvanostat (Hokuto Denko HABF-501). Electrochemical fixation of CO<sub>2</sub> to (1-chloroethyl)benzene **1** (0.1 mmol, 10 mM) was performed using Pt plate cathode (working electrode, 1.5×2 cm<sup>2</sup>) and Mg ribbon sacrificial anode or Pt plate anode (counter electrode, 1.5×2 cm<sup>2</sup>) in 0.1 M Bu<sub>4</sub>NBF<sub>4</sub>/DMF (10 mL). Electrolysis was conducted in constant current mode (18 mA cm<sup>-2</sup>) under mechanical stirring with a rotating magnet bar under CO<sub>2</sub> bubbling. After the electrolysis, the reaction mixture was evaporated under reduced pressure. 1.0 M aqueous HCl solution was poured into residues and then extracted with diethyl ether three times. The organic phase was evaporated under reduced pressure and the crude product was diluted with MeCN, and then analyzed using high-performance liquid chromatography (HPLC; Shimadzu LC-20AD and SPD-20A) to determine the yield of carboxylated product.

## 5. General Procedure for Electrochemical Carboxylation of Various Benzyl Halides Using Flow Microreactors

KdScientific model 100 syringe pumps were used to pump the reaction solutions. Benzyl halides **1**, **1'**, **3**, **5**, **7** were used as substrates for the electrochemical carboxylation. The solution containing of substrate (0.2 mmol, 10 mM) and saturated CO<sub>2</sub> in 0.1 M Bu<sub>4</sub>NBF<sub>4</sub>/DMF (20 mL) was introduced into the reactor. Constant current electrolyses (18 mA cm<sup>-2</sup>) were performed using the electrosynthetic flow microreactors composed of Pt plate anode (1×3 cm<sup>2</sup>) and various cathodes (1×3 cm<sup>2</sup>). The electrolytic solution ejected from the reactor was poured into 1.0 M aqueous HCl solution for acidification of the carboxylate ion, as shown in Figure S1. Then, the resulting solution was extracted with diethyl ether. The organic phase was analyzed using HPLC to determine the yield of carboxylated product.
